# Supplementary material for: Physiological and Transcripts Analyses Reveal the Mechanism by Which Melatonin Alleviates Heat Stress in Chrysanthemum Seedlings
Source: Front Plant Sci. 2021 Sep 22;12:673236. doi: 10.3389/fpls.2021.673236 (PMC8493036; doi:10.3389/fpls.2021.673236)
Supplement: Supplementary Table 13 — Detailed information of the changes in the expression of hormone related genes in Con, ConMT, S, and SMT comparisons. [file Table_13.xlsx]

## Sheet: ABA
The expression levels of ABA
Gene ID	Con1	Con2	Con3	Con1MT	Con2MT	Con3MT	S1	S2	S3	S1MT	S2MT	S3MT	log2(SMT/ConMT)	Qvalue(ConMT-vs-SMT)	log2(ConMT/Con)	Qvalue(Con-vs-ConMT)	log2(S/Con)	Qvalue(Con-vs-S)	log2(SMT/S)	Qvalue(S-vs-SMT)	Description
CL6937.Contig1_All	17.21	14.16	16.32	45.87	47.13	48.67	2.05	3.82	2.93	4.14	4.67	2.69	-3.66302	4.04e-52	1.55922	5.63e-19	-2.49874	3.98e-13	0.385374	0.999979	Abscisic acid receptor PYL4
CL9553.Contig2_All	1.78	3.63	2.42	12.03	9.13	9.05	0	0	0.26	0	0	0.17	-6.37112	1.25e-18	1.82365	2.99e-06	-4.06288	2.33e-06	-0.0492669	0.999979	Abscisic acid receptor PYL5
CL12506.Contig1_All	1.56	0.79	1.27	0.88	2.12	1.63	4.41	5.46	2.89	3.95	5.87	6.14	1.61205	0.00519327	0.275907	0.999995	1.59722	0.0120832	0.318266	0.999979	Protein phosphatase 2C 1
Unigene51534_All	3.11	3.94	2.64	4.51	4.73	4.33	27.36	29.66	28.4	22.71	22.06	20.59	2.17619	2.08e-42	0.459814	0.666899	2.9912	4.87e-54	-0.332117	0.460992	Protein phosphatase 2C 3
CL2771.Contig1_All	0.75	0	0.18	0	0.2	0.39	2.41	1.18	0.56	0.6	1.19	0.32	1.31989	0.412041	-0.23199	0.999995	1.49834	0.280729	-0.516074	0.999979	Protein phosphatase 2C 5
CL11044.Contig2_All	1.33	0.46	0.92	0.8	0.56	0.75	2.51	3.48	1.44	2.14	2.61	3.24	1.78326	0.00293938	-0.259694	0.999995	1.27934	0.0924158	0.143056	0.999979	Protein phosphatase 2C 6
CL15213.Contig4_All	0.54	0.28	0.49	0.28	0.39	0.19	1.14	1.04	1.1	1.33	1.02	1.24	1.87988	0.0053028	-0.42978	0.999995	1.18529	0.0886182	0.156636	0.999979	Protein phosphatase 2C 10
CL804.Contig2_All	1.05	0.42	0	0.87	0.32	1.79	2.16	2.93	2.51	0.9	3.18	4.57	1.31377	0.181744	0.574247	0.999995	1.97268	0.029402	0.189256	0.999979	Protein phosphatase 2C 11
CL6575.Contig8_All	0.66	0.9	1.11	0.93	0.91	0.58	3.4	4.59	5.88	3.72	3.42	3.66	2.07183	9.4e-12	-0.154666	0.999995	2.20635	2.06e-11	-0.289321	0.999979	Protein phosphatase 2C 16
CL2039.Contig1_All	1.38	1.65	1.58	0.95	1.22	1.11	7.58	4.95	2.97	8.13	6.29	7.27	2.62819	2.69e-14	-0.457739	0.999995	1.58663	0.00123544	0.477912	0.999979	Protein phosphatase 2C 25
Unigene54045_All	1.71	2.24	1.49	1.07	1.21	1.31	3.36	3.91	5.68	4.35	4.07	3.05	1.55042	0.000147685	-0.54114	0.950456	1.09047	0.0110202	-0.110385	0.999979	Protein phosphatase 2C 29
CL14122.Contig24_All	0.19	0.14	0.28	0.06	0.29	0.48	7.2	7.05	6.83	7.53	6.45	6.94	4.51211	1.84e-28	0.289251	0.999995	4.94837	5.42e-36	0.0346086	0.999979	Protein phosphatase 2C 47
CL13670.Contig2_All	0.34	0.1	0.27	0.46	0	0	1.66	1.13	0.63	1.48	1.33	1.32	2.5535	0.0154803	-0.188658	0.999995	1.91446	0.0561649	0.263755	0.999979	Protein phosphatase 2C 55
CL12343.Contig1_All	0.64	0.44	0.24	0.47	1.33	0.47	3.49	3.27	3.24	1.73	2.84	4.66	1.65358	0.10753	0.37973	0.999995	2.36116	0.0101017	-0.0406616	0.999979	Protein phosphatase 2C 56
Unigene5479_All	4.33	4.43	3.96	3.61	2.29	3.77	12.4	12.62	15.45	13.04	13.15	10.99	1.85237	5.95e-17	-0.388782	0.800356	1.53865	1.54e-18	-0.0677147	0.999979	ABSCISIC ACID-INSENSITIVE 5
Unigene18675_All	6.72	7.78	6.63	4.65	5.13	5.29	14.7	17.42	18.64	17.86	18.35	17.93	1.76066	1.15e-27	-0.479976	0.258366	1.13763	1.18e-09	0.144633	0.999979	ABF2

## Sheet: IAA
The expression levels of IAA
Gene ID	Con1	Con2	Con3	Con1MT	Con2MT	Con3MT	S1	S2	S3	S1MT	S2MT	S3MT	log2(SMT/ConMT)	Qvalue(ConMT-vs-SMT)	log2(ConMT/Con)	Qvalue(Con-vs-ConMT)	log2(S/Con)	Qvalue(Con-vs-S)	log2(SMT/S)	Qvalue(S-vs-SMT)	Description
CL536.Contig1_All	0.8	0	0.46	0.66	0	0.62	0.36	0.79	0	0	0	0	-1.18633	0.466761	0.130439	0.999995	0.328766	0.885106	-0.506011	0.999979	Transport inhibitor response 1
CL2761.Contig1_All	1.76	1.12	2.5	2.24	1.8	1.27	2.09	1.34	3.06	2.04	0.73	0.82	-0.611034	0.426959	-0.0131762	0.999995	0.155648	0.862921	-0.669137	0.999979	Transport inhibitor response 1
CL5304.Contig9_All	0.88	0.76	0.8	1.75	1.95	2.14	2.45	2.76	2.1	1.38	0.62	0.82	-1.08143	0.155602	1.07311	0.386213	1.41627	0.0285974	-1.09111	0.669885	AUX/IAA family
Unigene39728_All	4.03	4.65	2.1	10.12	7.91	10.53	7.79	9.85	12.54	4.3	4.9	6.72	-0.874195	0.0693446	1.26698	0.0402734	1.31802	0.01088	-0.764564	0.892128	AUX/IAA family
Unigene504_All	4.02	3.58	3.55	10.28	8.29	9.1	8.57	9.29	10.04	5.75	3.56	5.5	-0.969104	0.00474367	1.26319	0.000228257	1.20431	0.000126947	-0.818947	0.240235	AUX/IAA family
CL2077.Contig1_All	0.78	0.92	0.41	0.51	0.88	0.43	3.77	4.75	2.51	3.89	3	3.14	2.28553	0.0014211	-0.140269	0.999995	2.17848	0.00183076	-0.0834521	0.999979	Auxin response factor 18
CL10559.Contig3_All	2.03	2.36	2.55	2.86	2.6	2.29	5.39	5.39	6.29	5.82	4.9	4.9	0.923956	0.000875924	0.144879	0.999995	1.16292	1.95e-05	-0.0735617	0.999979	Auxin response factor 18
CL10759.Contig1_All	0.61	1.17	0.74	1.72	1.02	1.48	3.04	3.13	1.98	2.76	2.39	3.36	0.907302	0.087457	0.634484	0.966539	1.5154	0.00830447	0.0966628	0.999979	Auxin response factor 16
CL1094.Contig1_All	2.27	2.53	1.9	3.5	5.08	3	0.17	0.54	0.57	0.16	0.65	0.64	-2.9224	1.73e-06	0.714138	0.596156	-2.38492	0.000537116	0.150426	0.999979	Small auxin-up RNA
Unigene54965_All	1.58	1.33	0.36	3.87	1.33	1.06	1.62	3.56	2.88	2.23	2.1	3.46	0.232361	0.890203	0.536884	0.999995	0.981573	0.473833	0.0112184	0.999979	Small auxin-up RNA
CL11707.Contig2_All	40.32	33.61	45.13	56.7	55.42	56.44	79.52	87.64	78.09	49.24	69.42	72.28	0.106511	0.734623	0.500828	0.00195807	0.929968	7.8e-10	-0.300651	0.999979	Auxin-induced protein AUX28
CL12674.Contig1_All	23.53	20.88	17.2	24.84	33.99	27.92	61	72.06	85.01	54.29	52.77	57.56	0.843666	1.11e-07	0.485891	0.126782	1.69648	1.37e-22	-0.344877	0.574677	Auxin-responsive protein IAA7
CL1094.Contig1_All	2.27	2.53	1.9	3.5	5.08	3	0.17	0.54	0.57	0.16	0.65	0.64	-2.9224	1.73e-06	0.714138	0.596156	-2.38492	0.000537116	0.150426	0.999979	Indole-3-acetic acid-induced protein ARG7

## Sheet: GA
The expression levels of GA
Gene ID	Con1	Con2	Con3	Con1MT	Con2MT	Con3MT	S1	S2	S3	S1MT	S2MT	S3MT	log2(SMT/ConMT)	Qvalue(ConMT-vs-SMT)	log2(ConMT/Con)	Qvalue(Con-vs-ConMT)	log2(S/Con)	Qvalue(Con-vs-S)	log2(SMT/S)	Qvalue(S-vs-SMT)	Description
CL6258.Contig4_All	1.25	1.51	0.8	0.88	1.62	1.56	3.69	3.67	3.65	5.16	5.35	5.39	1.85831	7.47e-07	0.155976	0.999995	1.46642	0.000952352	0.552646	0.853125	Gibberellin receptor GID1
Unigene1089_All	0.3	0.31	0.28	0.07	0.13	0.14	2.85	2.89	0.94	5.12	5.6	5.39	5.003	2.42e-15	-0.726605	0.999995	2.51514	0.000563477	1.13982	0.204746	Gibberellin receptor GID1
CL800.Contig2_All	16.35	19.87	21.43	20.43	19.15	19.47	8.31	7.1	7.4	4.95	4.91	3.48	-2.21716	4.08e-35	0.0316428	0.999995	-1.44713	1.17e-14	-0.698191	0.145562	DELLA protein GAI
CL3736.Contig1_All	4.92	2.75	2.23	3.65	5.78	4.02	3.01	4.69	3.32	2.3	4.71	2.93	-0.410481	0.743315	0.333842	0.999995	0.073553	0.966452	-0.060897	0.999979	F-box protein GID2
Unigene18693_All	1.14	1.04	1.3	1.61	1.94	2.24	1.44	1.26	1.36	0.9	0.66	1.13	-1.15492	0.00571524	0.700244	0.324166	0.118248	0.864655	-0.494476	0.999979	Phytochrome interacting factor 3

## Sheet: ETH
The expression levels of ETH
Gene ID	Con1	Con2	Con3	Con1MT	Con2MT	Con3MT	S1	S2	S3	S1MT	S2MT	S3MT	log2(SMT/ConMT)	Qvalue(ConMT-vs-SMT)	log2(ConMT/Con)	Qvalue(Con-vs-ConMT)	log2(S/Con)	Qvalue(Con-vs-S)	log2(SMT/S)	Qvalue(S-vs-SMT)	Description
CL13756.Contig2_All	61.1	54.53	69.69	57.11	61.07	62.43	22.89	17.58	18.56	19.94	16.03	15.33	-1.89467	1.31e-58	-0.0373496	0.999995	-1.75739	5.87e-31	-0.153713	0.999979	EIN3-binding F-box protein 1
CL4490.Contig2_All	34.61	34.15	40.34	50.22	56.7	55.95	7.47	6.94	5.26	3.76	4.8	3.34	-3.84729	1.38e-148	0.572958	1.81e-06	-2.5689	1.1e-48	-0.654948	0.32352	EIN3-binding F-box protein 2
Unigene42989_All	0.74	0.45	0.67	0.33	0.77	0.33	1.83	2.28	4.39	0.3	0.83	1.33	0.552953	0.760459	-0.195724	0.999995	1.81871	0.036154	-1.13119	0.940046	Ethylene-responsive transcription factor ERF025

## Sheet: JA
The expression levels of JA
Gene ID	Con1	Con2	Con3	Con1MT	Con2MT	Con3MT	S1	S2	S3	S1MT	S2MT	S3MT	log2(SMT/ConMT)	Qvalue(ConMT-vs-SMT)	log2(ConMT/Con)	Qvalue(Con-vs-ConMT)	log2(S/Con)	Qvalue(Con-vs-S)	log2(SMT/S)	Qvalue(S-vs-SMT)	Description
CL5193.Contig1_All	5.09	4.01	4.4	2.27	1.83	1.78	0.79	0.3	0.8	2.13	1.34	1.36	-0.357824	0.650977	-1.14226	0.0114648	-2.85085	5.94e-10	1.08636	0.757458	JAZ2
CL11474.Contig1_All	4.66	3.3	5.13	7.79	8.62	5.66	1.58	1.69	0.97	1.58	1.13	1.35	-2.45614	4.46e-12	0.729477	0.173745	-1.66035	0.000157176	-0.0142761	0.999979	Transcription factor MYC2
CL1651.Contig1_All	5.47	4.19	4.61	11.66	14.11	12.64	0.56	0.93	1.3	0.37	0.41	1.18	-4.17125	2.35e-21	1.3822	4.23e-06	-2.3309	5.19e-06	-0.274158	0.999979	Transcription factor MYC2
Unigene24831_All	55.77	41.75	46.11	30.99	37.85	31.75	12.01	15.73	9.96	13.77	16.46	19.8	-1.07381	1.31771e-07	-0.503868	0.0213005	-2.01686	2.60832e-20	0.43824	0.999979	TIFY10C
CL13043.Contig3_All	2.28	2.76	2.81	3.3	2.48	2.76	4.92	4.44	4.16	7.13	6.69	6.22	1.15142	0.000611988	0.109011	0.999995	0.673067	0.135245	0.580333	0.827297	TIFY6B
CL12338.Contig2_All	7.75	6.44	7.75	3.96	4.36	4.64	1.43	1.56	1.36	1.95	2.61	2.18	-1.0061	0.00103947	-0.74614	0.00713414	-2.42879	9.59e-21	0.63255	0.999979	TIFY10B

## Sheet: MT
The expression levels of MT
Gene ID	Con1	Con2	Con3	Con1MT	Con2MT	Con3MT	S1	S2	S3	S1MT	S2MT	S3MT	log2(SMT/ConMT)	Qvalue(ConMT-vs-SMT)	log2(ConMT/Con)	Qvalue(Con-vs-ConMT)	log2(S/Con)	Qvalue(Con-vs-S)	log2(SMT/S)	Qvalue(S-vs-SMT)	Description
Unigene46955_All	10.13	7.37	8.25	11.58	14.57	14.14	24.82	25.29	18.09	25.4	21.53	28.3	0.822162	0.000806519	0.628847	0.233451	1.28854	8.05078e-06	0.18317	0.999979	SNAT
Unigene9535_All	1.66	1.06	1.65	2.41	2.69	1.65	2.74	3.19	2.26	2.33	3.67	3.92	0.467587	0.558206	0.57412	0.999995	0.790761	0.296767	0.295603	0.999979	COMT
Unigene17130_All	0.88	1.11	0.42	1.74	1.94	1.35	2.84	2.66	3.04	3.18	3.9	4.08	1.05614	0.00390859	0.944324	0.409155	1.66043	0.000507645	0.414546	0.999979	TDC
